# Supplementary material for: Continuous CO2 capture and methanation over Ni–Ca/Al2O3 dual functional materials
Source: Royal Society of Chemistry journal article supplement (doi:10.1039/d2ra07554g), 2023-01-01
Supplement: d2ra07554g1.pdf [file d2ra07554g1.pdf]

## Electronic supplementary information (ESI)

### Continuous CO<sub>2</sub> capture and methanation over Ni-Ca/Al<sub>2</sub>O<sub>3</sub> dual functional materials

Lingcong Li,<sup>1</sup> Ziyang Wu,<sup>1</sup> Shinta Miyazaki,<sup>1</sup> Takashi Toyao,<sup>1</sup> Zen Maeno,<sup>\*2</sup> Ken-ichi Shimizu<sup>\*1</sup>

<sup>1</sup> Institute for Catalysis, Hokkaido University, N-21, W-10, Sapporo 001-0021, Japan

<sup>2</sup> School of Advanced Engineering, Kogakuin University, 2665-1, Nakano-cho, Hachioji, 192-0015, Japan

\*Corresponding authors

Zen Maeno, E-mail: zmaeno@cc.kogakuin.ac.jp

Ken-ichi Shimizu, E-mail: kshimizu@cat.hokudai.ac.jp

## Figures

(a) Double reactor

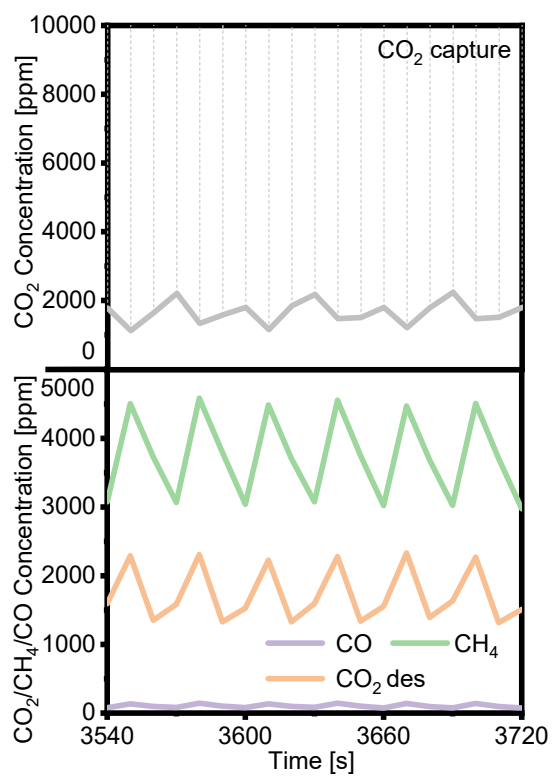

(b) Single reactor

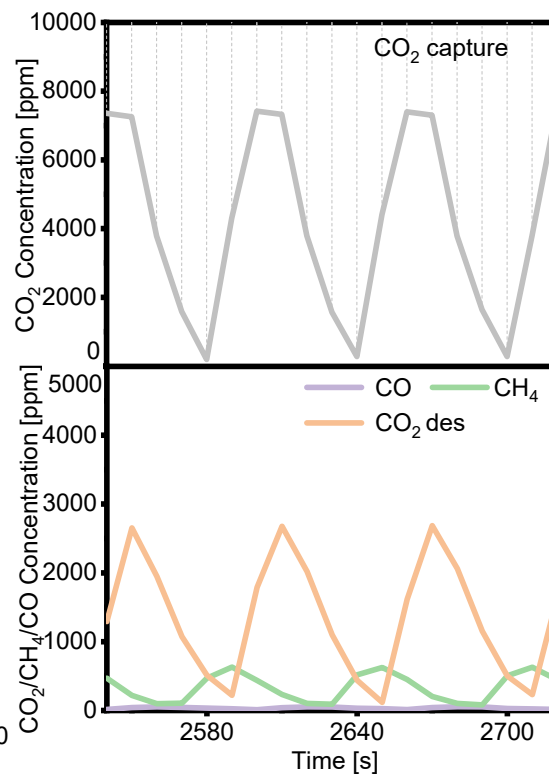

Figure S1. Effluent gas compositions for CCR over Ni(10)–Ca(30)/Al<sub>2</sub>O<sub>3</sub> in (a) double reactor and (b) single reactor systems. Conditions: 100 mg of catalyst, 450 °C, 100 mL min<sup>-1</sup> of 1% CO<sub>2</sub>/10% O<sub>2</sub>/N<sub>2</sub> for 30 s, switched to 100 mL min<sup>-1</sup> of H<sub>2</sub> for 30 s.

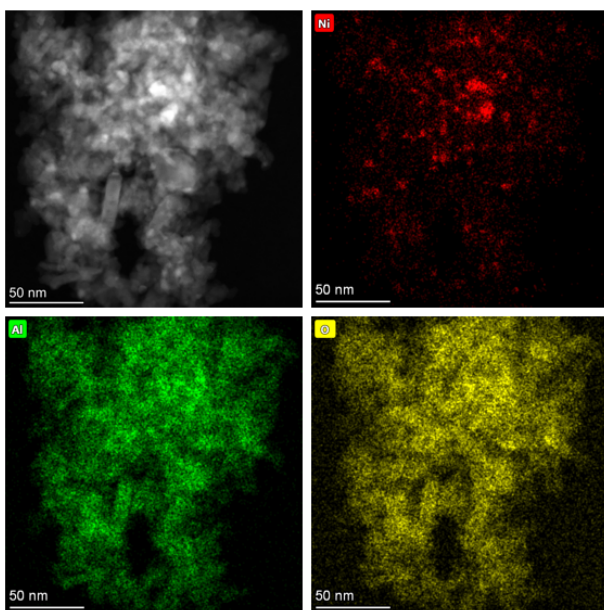

Figure S2. STEM images and EDS mapping of Ni(10)/Al<sub>2</sub>O<sub>3</sub>.

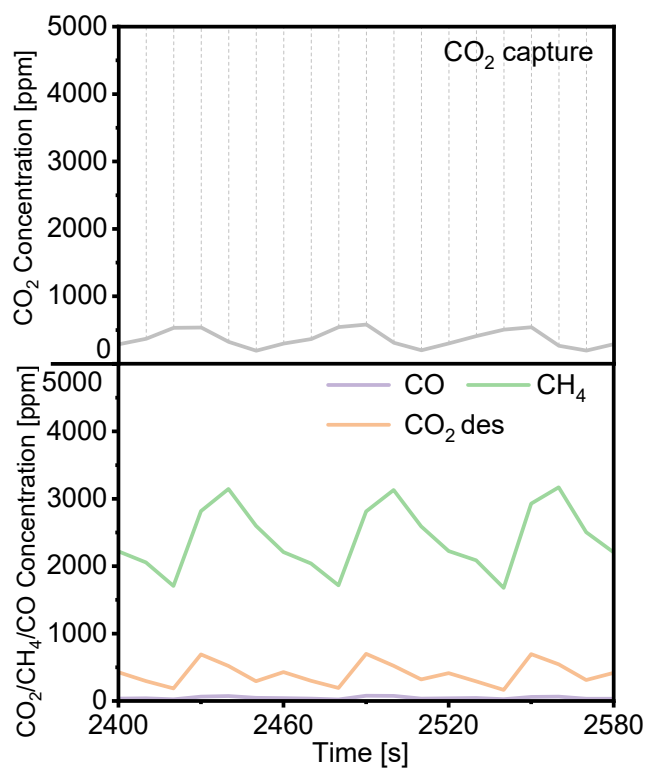

Figure S3 Effluent gas composition for continuous operated CCR over Ni(10)/Ca<sub>12</sub>Al<sub>14</sub>O<sub>33</sub>. Conditions: 100 mg of catalyst, 450 °C, 100 mL min<sup>-1</sup> of 0.5% CO<sub>2</sub>/10% O<sub>2</sub>/N<sub>2</sub> for 30 s, switched to 100 mL min<sup>-1</sup> of H<sub>2</sub> for the other 30 s.

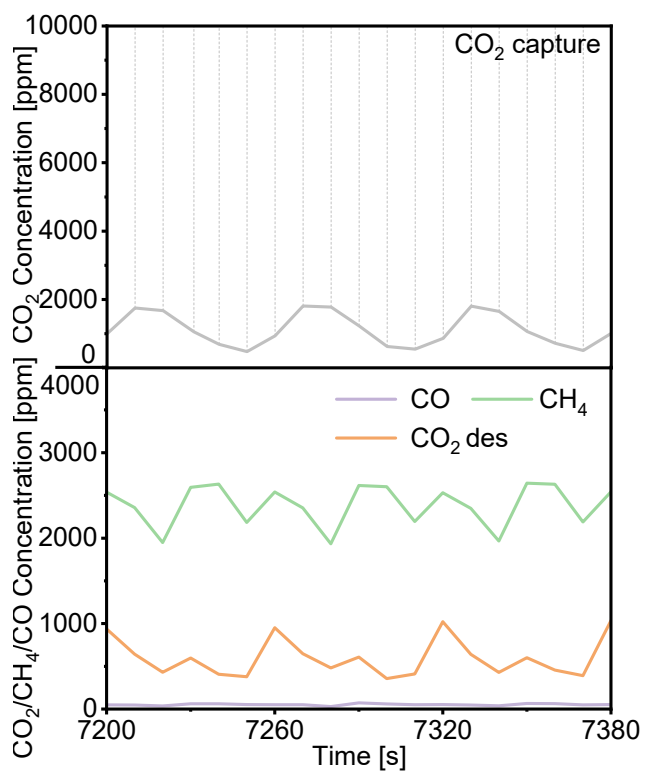

Figure S4 Continuous CCR operation with flowing steam over Ni(10)-Ca(30)/Al<sub>2</sub>O<sub>3</sub>. Conditions: 100 mg of catalyst for each reactor, 450 °C, 100 mL min<sup>-1</sup> of 1% CO<sub>2</sub>/10% O<sub>2</sub>/N<sub>2</sub> with 20% water vapor for 30 s, switched to 100 mL min<sup>-1</sup> of H<sub>2</sub> for the other 30 s.

Table S1. Comparison of CCR performance among the reported Ni-Ca based DFMs.

| Ni-Ca DFM                                    | Reaction Temperature [°C] | CO <sub>2</sub> capture [μmol g <sup>-1</sup> ] | CO <sub>2</sub> conversion (%) | CH <sub>4</sub> formation [μmol g <sup>-1</sup> ] | CH <sub>4</sub> selectivity (%) | Ref.                                                         |
|----------------------------------------------|---------------------------|-------------------------------------------------|--------------------------------|---------------------------------------------------|---------------------------------|--------------------------------------------------------------|
| 10% Ni-30% Ca/Al <sub>2</sub> O <sub>3</sub> | 450                       | 340                                             | 46                             | 153                                               | 97                              | This work                                                    |
| 1% Ni-CaO                                    | 550                       | 9200                                            | 38                             | 2000                                              | 58                              | Fuel <b>2021</b> , 286, 119308                               |
| 10% Ni-CaO                                   | 550                       | 8100                                            | 45                             | 2500                                              | 69                              | Fuel <b>2021</b> , 286, 119308                               |
| 10% Ni-15% Ca-Al <sub>2</sub> O <sub>3</sub> | 450                       | 73                                              | 82                             | 58                                                | 97                              | <i>ACS Sustainable Chem. Eng.</i> <b>2021</b> , 9, 3452–3463 |
| 5% Ni/15%Ca-Al <sub>2</sub> O <sub>3</sub>   | 520                       | ---                                             | ---                            | 223                                               | ---                             | <i>J. CO<sub>2</sub> Util.</i> <b>2019</b> , 34, 576-587     |
| 10% Ni/15%Ca-Al <sub>2</sub> O <sub>3</sub>  | 520                       | ---                                             | ---                            | 225                                               | ---                             | <i>J. CO<sub>2</sub> Util.</i> <b>2019</b> , 34, 576-587     |
| 15% Ni/20%Ca-Al <sub>2</sub> O <sub>3</sub>  | 450                       | ---                                             | 66.6                           | ---                                               | 63.2                            | <i>J. CO<sub>2</sub> Util.</i> <b>2019</b> , 31, 143-151     |
